# Supplementary material for: Oceanographic structure drives the assembly processes of microbial eukaryotic communities
Source: PubMed Central journal article supplement — ISME J. 2014 Oct 17;9(4):990–1002. doi: 10.1038/ismej.2014.197 (PMC4817713; doi:10.1038/ismej.2014.197), 2014-10-17
Supplement: ismej2014197x1.pdf [file ismej2014197x1.pdf]

# **Oceanographic structure drives the assembly processes of microbial eukaryotic communities**

Adam Monier, Jérôme Comte, Marcel Babin, Alexandre Forest, Atsushi Matsuoka, and Connie Lovejoy

## **Supplementary Information (SI)**

### **SI Materials and Methods**

Seawater sampling and oceanographic data analyses.

SI references.

### **SI Figures**

Titles and legends to SI figures.

Figure S1: Temperature and beam attenuation profiles.

Figure S2: Unweighted Unifrac and OTU abundances.

Figure S3: Phylogenetic diversity.

Figure S4: Relative abundance heatmap.

Figure S5: Phylogenetic placements of Picozoa OTUs.

### **SI Tables**

Table S1: Ancillary data.

Table S2: Sequence and diversity summary.

Table S3: Environmental variable statistical analyses.

Table S4: SCM/wSCM differentially abundant taxa.

## SI Materials and Methods

### *Seawater sampling and oceanographic data analyses*

Sampling took place aboard the Canadian research icebreaker CCGS *Amundsen* in August 2009, as part of the International Polar Year, project MALINA. At every station, a rosette system equipped with a conductivity-temperature-depth profiler (CTD, Seabird SBE-911+), a fluorometer (Seapoint), and a transmissometer (WetLabs C-Star) was deployed multiple times. Relative nitrate profiles were retrieved from the rosette mounted *in situ* ultraviolet spectrometer probe (ISUS; Satlantic). The rosette system was also equipped with a sensor (Biospherical Instruments) for downwelling photosynthetically active radiation (PAR; 400 to 700 nm, dynamic range from  $1.4 \times 10^{-5}$  to  $0.5 \mu\text{E cm}^{-2} \text{ s}^{-1}$ ). A similar deck sensor measured surface PAR during the rosette deployments. The CTD data were calibrated and verified following the Unesco Technical Papers (Crease *et al.* 1988). Periodically, discrete water samples were collected directly from the Niskin bottles for salinity calibration using a Guildline Autosal salinometer. The fluorescence data from the fluorometer were calibrated against *in situ* chlorophyll *a* (Chl *a*) concentrations as described in Forest *et al.* (2013). The transmissivity signal was transformed into  $c_p$  using standard equations (Kirk 1994). Verified underwater PAR data were normalized to surface irradiance to compute the percentage of transmitted PAR. All CTD and sensor data were averaged over 1 m bins.

Nutrient samples were collected at 10 to 20 m intervals in the upper water column (Tremblay *et al.* 2008; Martin *et al.* 2010) directly from Niskin-type bottles. Nitrate [ $\text{NO}_3^-$ ] and nitrite [ $\text{NO}_2^-$ ] samples were dispensed into polyethylene tubes, immediately poisoned with mercuric chloride [ $1 \mu\text{g ml}^{-1}$ ; (Kirkwood 1992)] and stored for subsequent laboratory analysis. [ $\text{NO}_3^-$ ] and [ $\text{NO}_2^-$ ] were measured using a Technicon AutoAnalyzer II following Tréguer and LeCorre (1975). Concentrations in the nanomolar range (detection limit of  $3 \text{ nmoles l}^{-1}$ ) were obtained as in Raimbault *et al.* (1990). Ammonium concentrations [ $\text{NH}_4^+$ ] were measured directly on board using the sensitive fluorescent method of Holmes *et al.* (1999) with a detection limit of  $5 \text{ nmoles l}^{-1}$ . The reproducibility of nutrient measurements between analyses was assessed using in-house standards compared with commercially available products (OSIL: <http://www.osil.co.uk/Products/SeawaterStandards>).

Cell abundances were determined using a flow cytometer FACS ARIA (Becton Dickinson, San Jose, CA) on-board the CCGS *Amundsen* as previously described for bacterial (Ortega-Retuerta *et al.*, 2012), pico- and nano-phytoplanktonic cells (Balzano *et al.*, 2012). Bacterial production was measured using <sup>3</sup>H-leucine incorporation as in Ortega-Retuerta *et al.* (2012). All physical, biological and nutrient data are available at <http://malina.obs-vlfr.fr>.

### ***SI References***

- Balzano S, Gourvil P, Siano R, Chanoine M, Marie D, Lessard S, Sarno D, Vaultot D. (2012). Diversity of cultured photosynthetic flagellates in the northeast Pacific and Arctic Oceans in summer. *Biogeosciences* **11**:4553–4571.
- Crease J, Dauphinée TM, Grose PL, Lewis EL, Fofonoff NP, Plakhin EA, *et al.* (1988). The acquisition, calibration and analysis of CTD data. *UNESCO Tech. Pap. Mar. Sci* **54**:94.
- Forest A, Babin M, Stemmann L, Picheral M, Sampei M, Fortier L, *et al.* (2013). Ecosystem function and particle flux dynamics across the Mackenzie Shelf (Beaufort Sea, Arctic Ocean): an integrative analysis of spatial variability and biophysical forcings. *Biogeosciences* **10**:2833–2866.
- Harding T, Jungblut AD, Lovejoy C, Vincent WF. (2011). Microbes in high arctic snow and implications for the cold biosphere. *Appl Environ Microb* **77**:3234–3243.
- Holmes RM, Aminot A, K erouel R, Hooker BA, Peterson BJ. (1999). A simple and precise method for measuring ammonium in marine and freshwater ecosystems. *Can J Fish Aquat Sci* **56**:1801–1808.
- Kirk JTO. (1994). Light and photosynthesis in aquatic ecosystems. Cambridge university press.
- Kirkwood DS. (1992). Stability of solutions of nutrient salts during storage. *Mar Chem* **38**:151–164.
- Martin J, Tremblay J , Gagnon J, Tremblay G, Lapoussi re A, Jose C, *et al.* (2010). Prevalence, structure and properties of subsurface chlorophyll maxima in Canadian Arctic waters. *Mar. Ecol. Prog. Ser.* **412**:69–84.
- Ortega-Retuerta E, Jeffrey WH, Babin MB, B langer S, Benner R, Marie D, Matsuoka A, Raimbault P, Joux F. (2012). Carbon fluxes in the Canadian Arctic: patterns and drivers of bacterial abundance, production and respiration on the Beaufort Sea margin. *Biogeosciences* **9**:3679–3692.

Raimbault P, Slawyk G, Coste B, Fry J. (1990). Feasibility of using an automated colorimetric procedure for the determination of seawater nitrate in the 0 to 100 nM range: Examples from field and culture. *Mar. Biol.* **104**:347–351.

Tremblay J-É, Simpson K, Martin J, Miller L, Gratton Y, Barber D, *et al.* (2008). Vertical stability and the annual dynamics of nutrients and chlorophyll fluorescence in the coastal, southeast Beaufort Sea. *J Geophys Res-Oceans* **113**.

Tréguer P, LeCorre P. (1975). Manuel d'analyses des sels nutritifs dans l'eau de mer (Utilisation de l'Autoanalyser II). *Université de Bretagne Occidentale, Laboratoire d'Océanographie chimique* **110**.

### **Titles and legends to SI figures**

**Figure S1.** **A.** Temperature and **B.** beam attenuation ( $c_p$ ) profiles. Measures were collected from Beaufort Sea CTD rosette casts from which microbial communities were retrieved. Distinct solid and dashed lines represent the six distinct sampling stations. Stations corresponding to weak SCM are colored in red.

**Figure S2.** **A.** Nonmetric multidimensional scaling (NMDS) ordination on unweighted UniFrac distances for the 24 Beaufort Sea microbial communities. Ellipses represent community clusters and 95% confidence intervals. Samples are represented by markers (depths) and numbers (stations). **B.** Procrustes rotations between NMDS ordinations computed on weighted and unweighted UniFrac distances ( $d_{w5000}$  and  $d_{w5000}$ , respectively). Arrows summarizing the rotations between ordinations are colored based on their corresponding community clusters. **C.** OTU rank abundance curves and, **D.** total sequence numbers for the 50 most abundant OTUs for each Beaufort Sea microbial community clusters.

**Figure S3.** **A.** Phylogenetic diversity (Faith's definition) measures for each Beaufort Sea microbial community clusters. Phylogenetic diversity was computed on datasets subsampled 1000 times at an even depth of 5000 sequences. Plotted are mean phylogenetic diversity and error bars are s.e.m. **B.** Relationship between sample depth and phylogenetic diversity. The line represents a least-squares linear regression. Dots are scaled based on corresponding OTU richness.

**Figure S4.** Relative abundance heatmap of the 25 most abundant taxa (genera, family or 'groups' depending on available taxonomic information) in the Beaufort Sea sequence datasets. Relative abundances were centered-scaled and corresponding z-score scale is displayed as a color gradient (green: abundant; red: rare). Taxonomic lineages of the 25 taxa are indicated by colored dots. Row dendrogram represents results from a hierarchical clustering of taxa relative abundances; columns were regrouped based on Beaufort Sea microbial community clusters.

**Figure S5.** Phylogenetic placements of the Picozoa OTUs. Representative sequences of Picozoa-like OTUs were mapped onto a Picozoa reference tree using RAxML evolutionary placement algorithm. The Picozoa maximum-likelihood reference tree was reconstructed based on an 18S rDNA gene sequence alignment. Picozoa reference sequences were clustered at 99% identity to remove redundancy prior to the phylogenetic reconstruction (number of sequences in a cluster is indicated in parentheses after the Genbank accession of the reference representative sequence). Bootstrap supports are represented by black dots when  $\geq 70\%$ . OTU identifiers are displayed in red; an asterisk after the OTU identifier denotes a phylogenetic placement with a likelihood  $\geq 0.75$ . Relative abundances of Picozoa OTUs across the Beaufort Sea community clusters are displayed on the right.

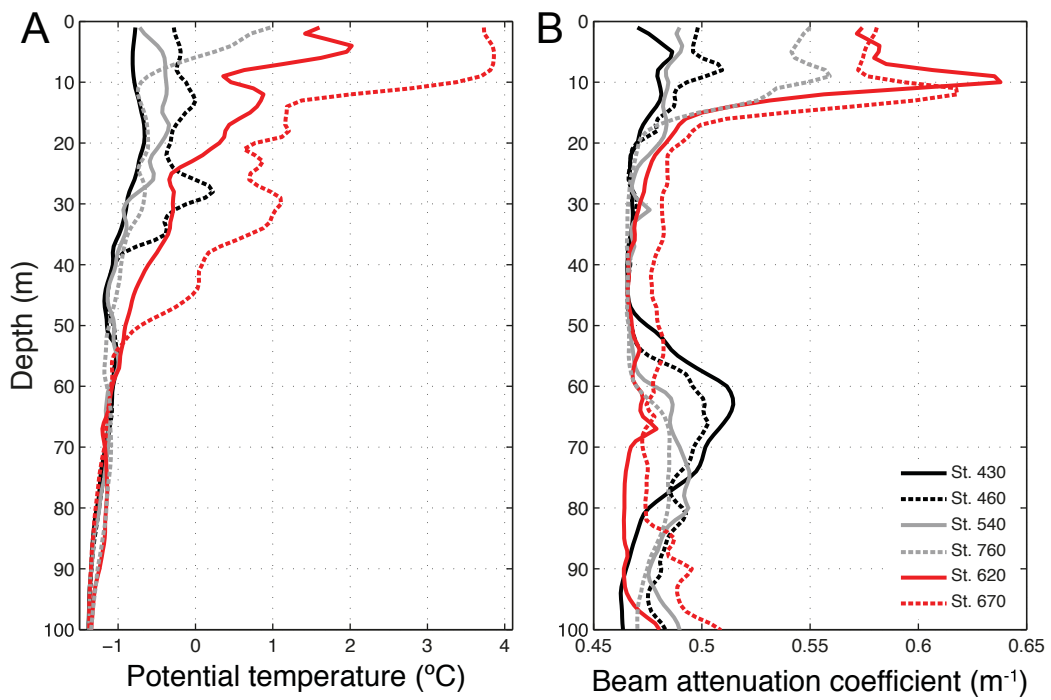

Figure S1

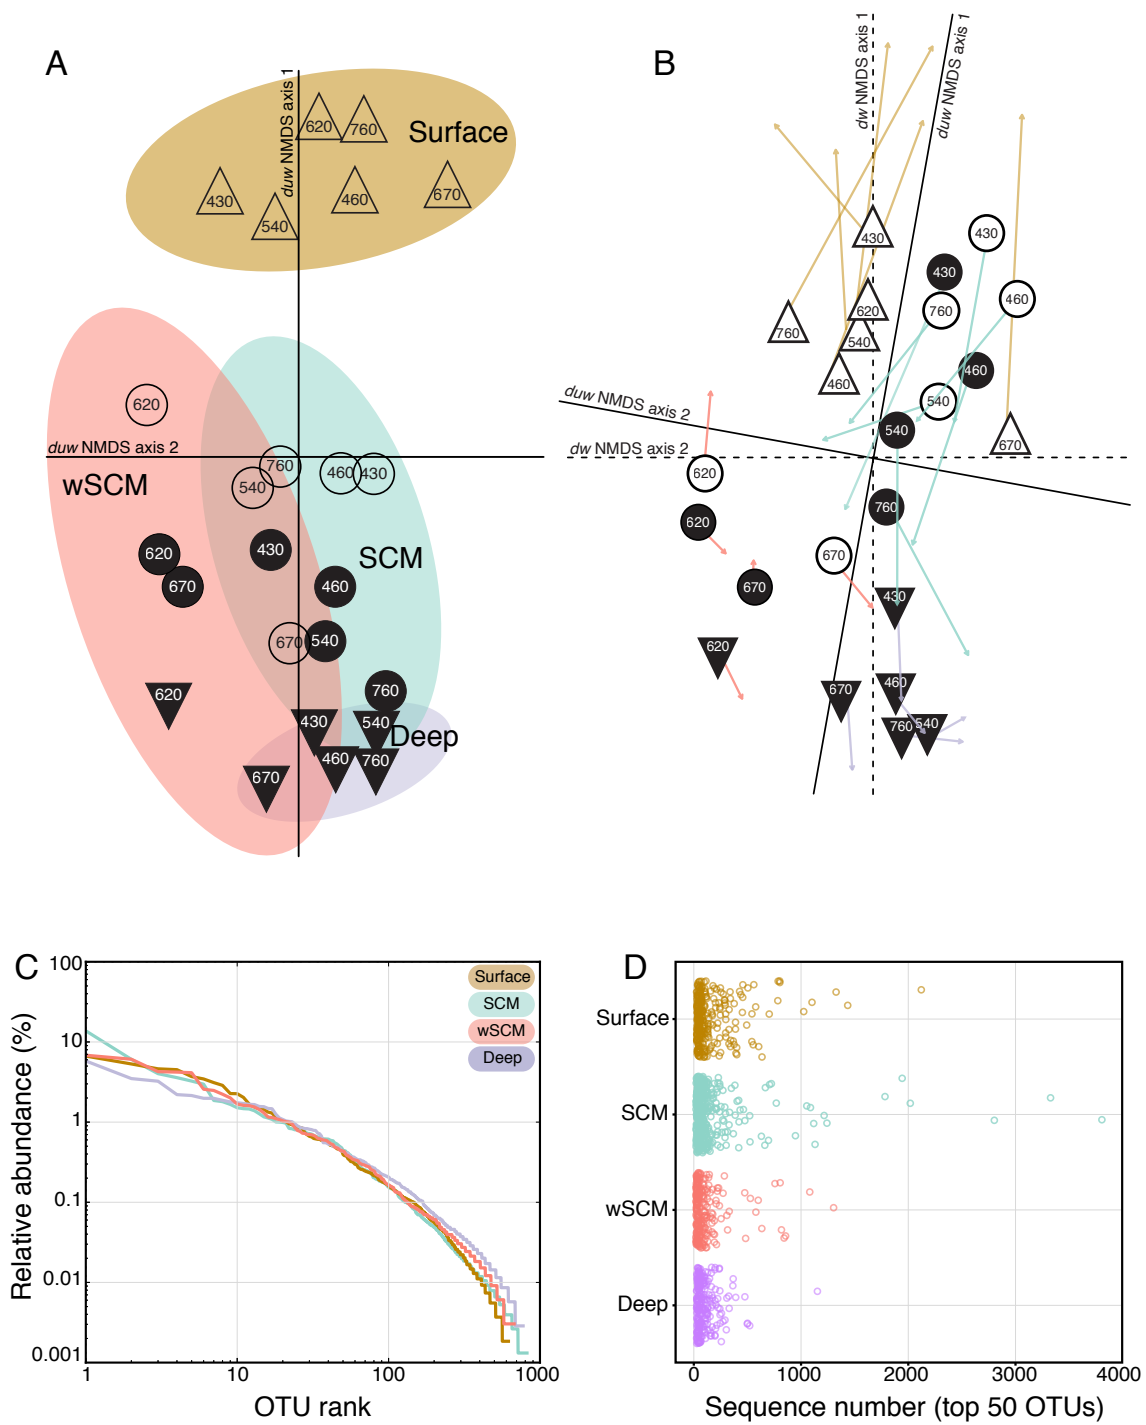

Figure S2

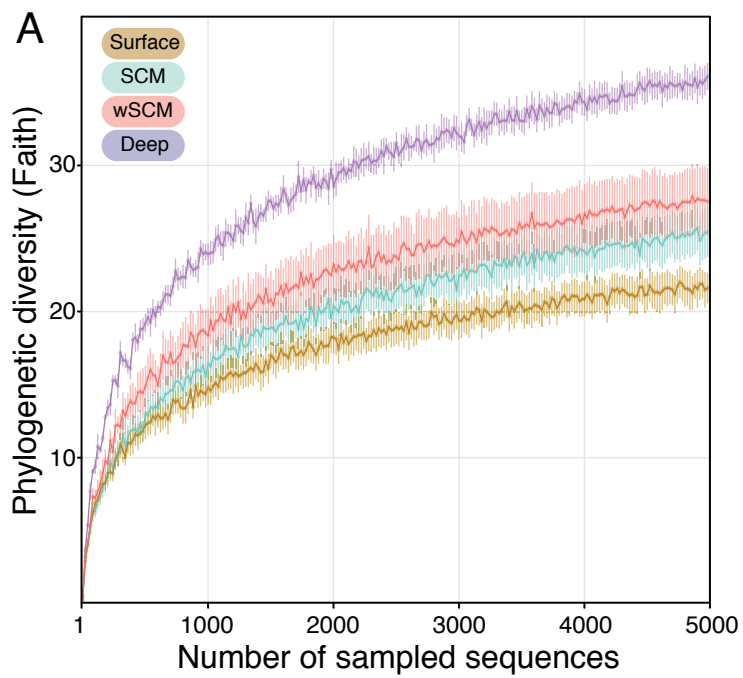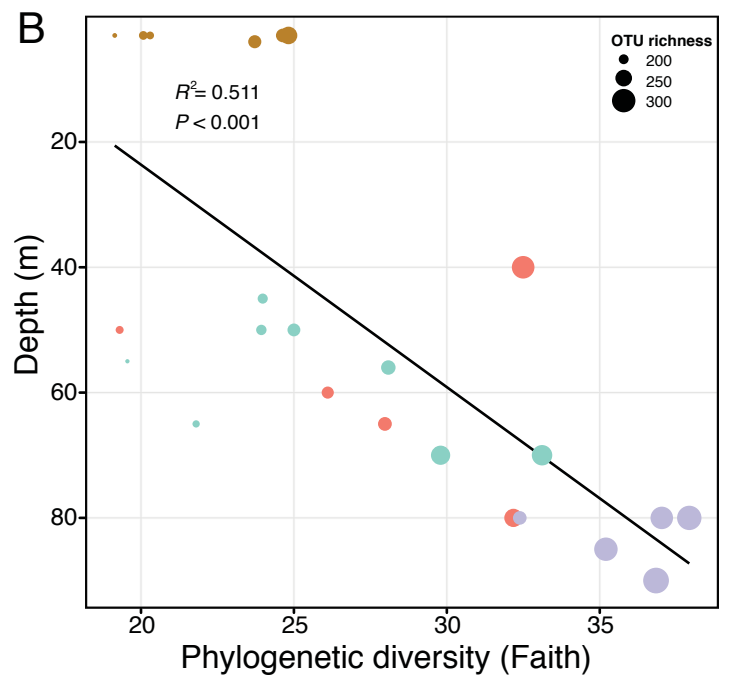

Figure S3



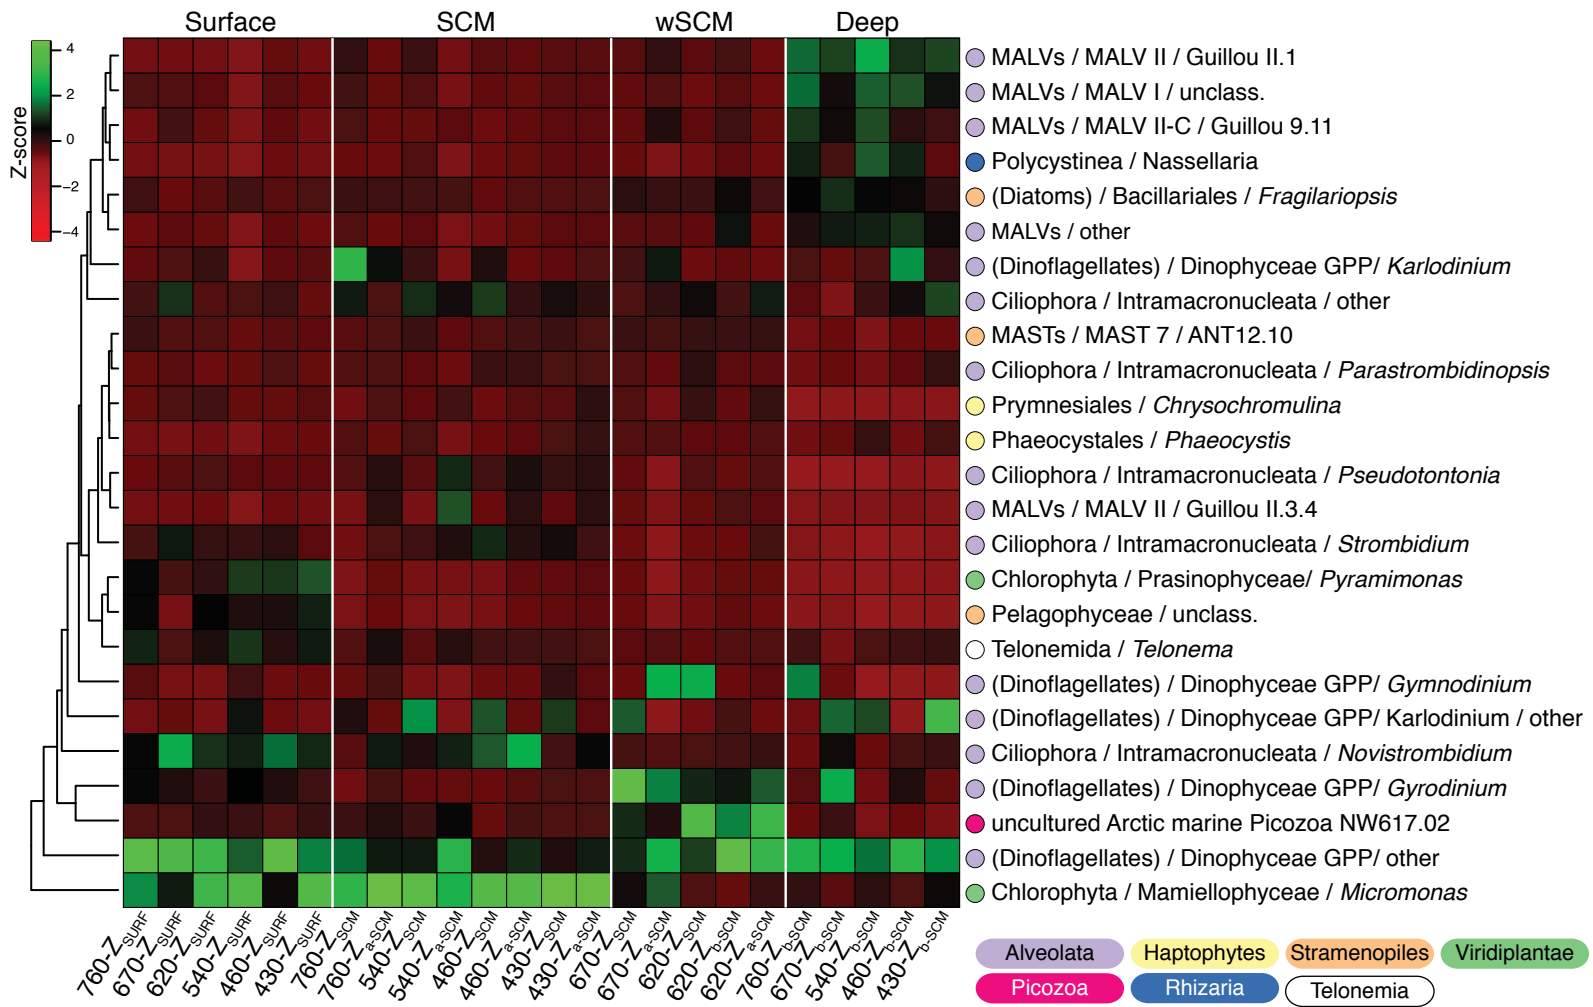

Figure S4

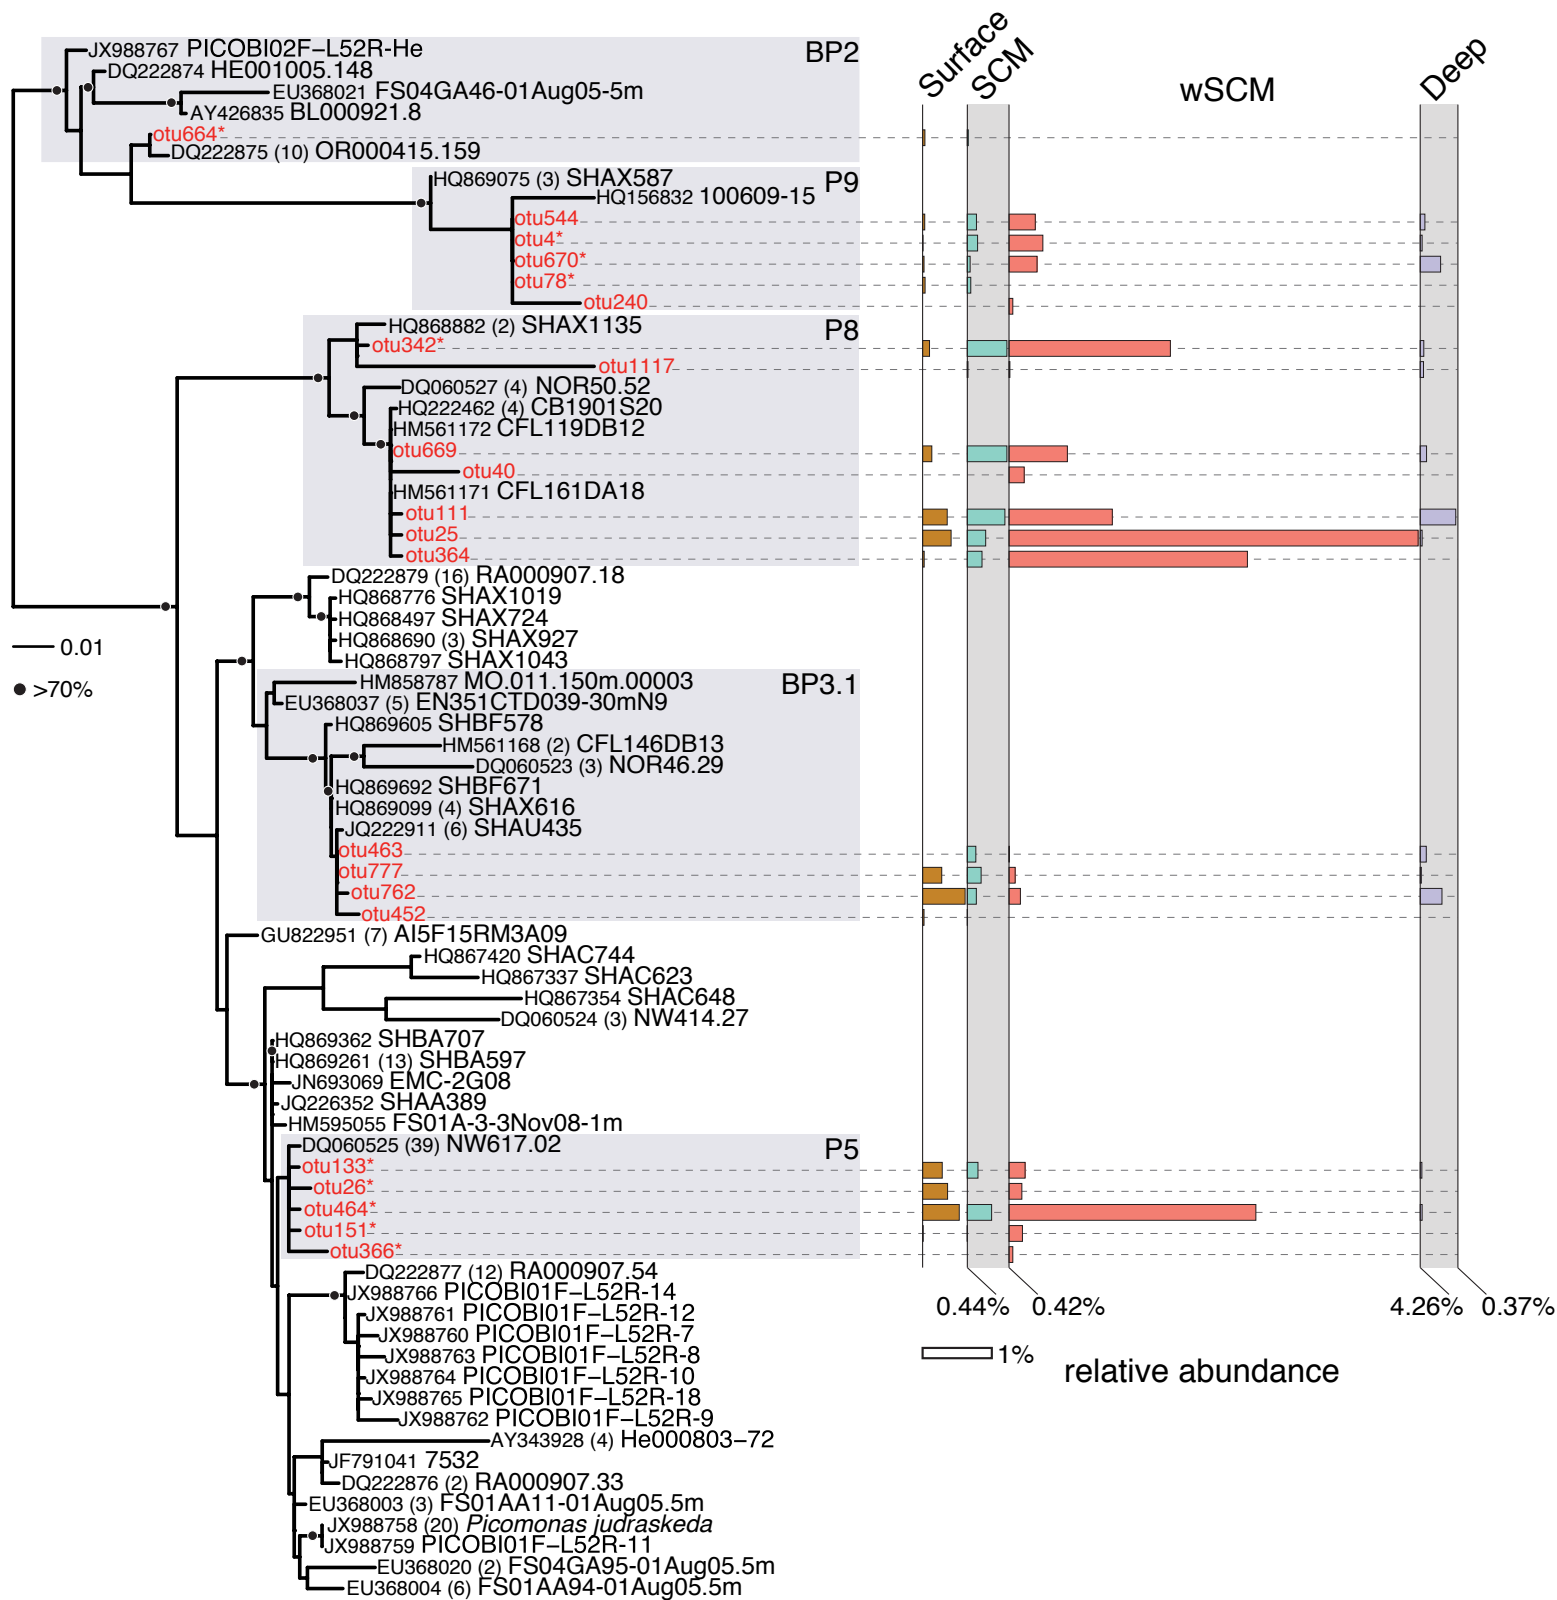

Figure S5

**Table S1.** Ancillary data for the Beaufort Sea sampling stations. The data, along with those presented in Figure 2, were used for BEST selection of environmental parameters. Additional ancillary data for the MALINA project are available at <http://malina.obs-vlfr.fr>.

| Station | Date 2009 | Z                  | Z (m) | O <sub>2</sub> <sup>a</sup> | Phaeo small <sup>b</sup> | Phaeo large <sup>b</sup> | NO <sub>3</sub> +NO <sub>2</sub> <sup>c</sup> | NH <sub>4</sub> <sup>c</sup> | PO <sub>4</sub> <sup>c</sup> | SiOH <sub>4</sub> <sup>c</sup> | POC <sup>c</sup> | DOC <sup>c</sup> | DON <sup>c</sup> | DOP <sup>c</sup> | PP <sup>d</sup> | BP <sup>e</sup> | Bacteria <sup>f</sup> | Nano <sup>f</sup> | Pico <sup>f</sup> | CDOM <sup>g</sup> |
|---------|-----------|--------------------|-------|-----------------------------|--------------------------|--------------------------|-----------------------------------------------|------------------------------|------------------------------|--------------------------------|------------------|------------------|------------------|------------------|-----------------|-----------------|-----------------------|-------------------|-------------------|-------------------|
| 430     | 18/09     | Z <sub>SURF</sub>  | 3     | 8.63                        | 0.01                     | 0                        | 0.01                                          | 0                            | 0.52                         | 2.89                           | 1.76             | 60.99            | 5.57             | 0.19             | 0.52            | 3.07            | 238830                | 427               | 5171              | 0.07              |
|         |           | Z <sub>a-SCM</sub> | 55    | 8.88                        | 0.33                     | 0.05                     | 2.93                                          | 0.02                         | 0.99                         | 8.99                           | 3.11             | n.a.             | n.a.             | n.a.             | 1.98            | 3.78            | 360052                | 1047              | 9854              | 0.08              |
|         |           | Z <sub>SCM</sub>   | 65    | 8.21                        | 0.37                     | 0.04                     | 6.80                                          | 0                            | 1.30                         | 14.52                          | 2.38             | 65.76            | 6.16             | 0.10             | 0.45            | 3.06            | 447085                | 831               | 13057             | 0.10              |
|         |           | Z <sub>b-SCM</sub> | 80    | 7.22                        | 0.03                     | 0.02                     | 12.89                                         | 0                            | 1.79                         | 27.88                          | n.a.             | n.a.             | n.a.             | n.a.             | n.a.            | 0.74            | 169411                | 682               | 974               | 0.10              |
| 460     | 19/08     | Z <sub>SURF</sub>  | 4     | 8.57                        | 0.02                     | 0                        | 0.01                                          | 0                            | 0.54                         | 3.04                           | 2.82             | 57.80            | 10.14            | 0.20             | 0.93            | 8.70            | n.a.                  | n.a.              | n.a.              | 0.08              |
|         |           | Z <sub>a-SCM</sub> | 45    | 9.26                        | 0.03                     | 0                        | 0.02                                          | 0                            | 0.75                         | 4.04                           | 1.18             | 59.44            | 12.24            | 0.22             | 0.42            | 3.85            | n.a.                  | n.a.              | n.a.              | 0.08              |
|         |           | Z <sub>SCM</sub>   | 56    | 8.99                        | 0.28                     | 0.05                     | 1.93                                          | 0.02                         | 0.91                         | 7.60                           | 2.82             | 57.80            | 9.45             | 0.22             | 0.96            | 2.15            | n.a.                  | n.a.              | n.a.              | 0.09              |
|         |           | Z <sub>b-SCM</sub> | 80    | 7.32                        | 0.06                     | 0.03                     | 11.50                                         | 0.01                         | 1.66                         | 25.21                          | 0.59             | 63.67            | 9.47             | 0.27             | n.a.            | 0.49            | n.a.                  | n.a.              | n.a.              | 0.10              |
| 540     | 17/08     | Z <sub>SURF</sub>  | 3     | 8.72                        | 0.01                     | 0.03                     | 0.01                                          | 0                            | 0.55                         | 3.09                           | 1.68             | 62.07            | 5.73             | 0.20             | 0.75            | 7.39            | 193087                | 490               | 2887              | 0.07              |
|         |           | Z <sub>a-SCM</sub> | 50    | 9.13                        | 0.04                     | 0                        | 0.03                                          | 0                            | 1.36                         | 3.83                           | 1.40             | 69.43            | 5.14             | 0.15             | 0.63            | 2.68            | 266374                | 509               | 2289              | 0.08              |
|         |           | Z <sub>SCM</sub>   | 70    | 8.26                        | 0.29                     | 0.06                     | 6.17                                          | 0.01                         | 2.20                         | 14.04                          | 1.77             | 83.22            | 5.77             | 0.10             | 0.91            | 1.34            | 221987                | 915               | 2091              | 0.09              |
|         |           | Z <sub>b-SCM</sub> | 85    | 7.15                        | 0.06                     | 0.06                     | 10.28                                         | 0.01                         | 2.75                         | 22.43                          | 0.84             | 77.07            | 6.32             | 0.07             | 0.16            | 0.64            | 137003                | 146               | 368               | 0.10              |
| 620     | 11/08     | Z <sub>SURF</sub>  | 3     | 8.35                        | 0                        | 0                        | 0                                             | 0.03                         | 0.33                         | 7.82                           | 5.61             | 99.48            | 4.56             | 0.11             | 3.36            | 14.71           | 424847                | 522               | 4036              | 0.13              |
|         |           | Z <sub>a-SCM</sub> | 50    | 9.14                        | 0.02                     | 0.01                     | 0.01                                          | 0                            | 0.63                         | 3.60                           | 0.92             | 60.77            | 4.34             | 0.19             | 0.22            | 5.44            | 280552                | 253               | 67                | 0.08              |
|         |           | Z <sub>SCM</sub>   | 65    | 8.90                        | 0                        | 0                        | 2.01                                          | 0.16                         | 0.91                         | 8.90                           | 1.15             | 51.40            | 4.21             | 0.14             | 0.40            | 4.91            | 297468                | 146               | 108               | 0.09              |
|         |           | Z <sub>b-SCM</sub> | 80    | 8.04                        | 0                        | 0.01                     | 6.83                                          | 0.05                         | 1.26                         | 18.34                          | 0.92             | n.a.             | n.a.             | n.a.             | 0.07            | 2.70            | 237149                | 128               | 0                 | 0.11              |
| 670     | 10/08     | Z <sub>SURF</sub>  | 3     | 8.11                        | 0                        | 0                        | 0.01                                          | 0.02                         | 0.41                         | 7.76                           | 5.96             | 94.43            | 4.43             | 0.10             | 2.07            | 36.95           | 874089                | 400               | 1902              | 0.14              |
|         |           | Z <sub>a-SCM</sub> | 40    | 9.28                        | 0                        | 0                        | 0.04                                          | 0.02                         | 0.65                         | 3.46                           | n.a.             | 74.20            | 5.65             | 0.53             | n.a.            | 10.18           | 399293                | 190               | 128               | 0.09              |
|         |           | Z <sub>SCM</sub>   | 60    | 8.50                        | 0                        | 0.11                     | 0.33                                          | 0.07                         | 0.96                         | 8.13                           | 1.95             | 72.25            | 14.68            | 0.76             | 0.17            | 2.10            | 300520                | 1072              | 0                 | 0.09              |
|         |           | Z <sub>b-SCM</sub> | 80    | 7.29                        | 0.02                     | 0.02                     | 6.30                                          | 0.03                         | 1.29                         | 15.33                          | 1.15             | 59.96            | 3.92             | 0.11             | 0.14            | 1.310           | 244390                | 433               | 1049              | 0.10              |
| 760     | 12/08     | Z <sub>SURF</sub>  | 3     | 8.62                        | 0.01                     | 0                        | 0.01                                          | 0.01                         | 0.39                         | 4.86                           | 3.55             | 108.40           | 15.83            | 0.56             | 1.70            | 13.87           | 395137                | 723               | 4333              | 0.11              |
|         |           | Z <sub>a-SCM</sub> | 50    | 9.22                        | 0.03                     | 0.01                     | 0                                             | 0.01                         | 0.68                         | 3.38                           | 1.83             | 57.57            | 4.20             | 0.09             | 0.11            | 3.27            | 366178                | 743               | 5000              | 0.08              |
|         |           | Z <sub>SCM</sub>   | 70    | 8.90                        | 0.18                     | 0.01                     | 2.93                                          | 0.01                         | 1                            | 8.43                           | 1.37             | 62.56            | 4.66             | 0.08             | 0.34            | 1.22            | 306567                | 1174              | 4423              | 0.09              |
|         |           | Z <sub>b-SCM</sub> | 90    | 7.36                        | 0.03                     | 0.02                     | 10.04                                         | 0.01                         | 1.54                         | 21.72                          | 0.69             | 58.72            | 5.27             | 0.04             | 0.10            | 0.68            | 162854                | 406               | 0                 | 0.10              |

Phaeo: phaeopigments; POC: particulate organic carbon; DOC: dissolved organic carbon; DON: dissolved organic nitrogen; DOP: dissolved organic phosphorus; PP: primary production; BP: bacterial production; CDOM: colored dissolved organic matter.

<sup>a</sup>:  $\mu\text{M kg}^{-1}$ .

<sup>b</sup>: in  $\text{mg m}^{-3}$ ; small: 0.7-5  $\mu\text{m}$ , large: 5-20 $\mu\text{m}$ .

<sup>c</sup>: in  $\mu\text{M}$ .

<sup>d</sup>: in  $\text{mgC m}^{-3} 24\text{h}^{-1}$ .

<sup>e</sup>: in  $\text{pmol leu l}^{-1} \text{h}^{-1}$ .

<sup>f</sup>: bacterial, nano- and picophytoplanktonic cell abundances in  $\text{cell ml}^{-1}$  (flow cytometry).

<sup>g</sup>: *in situ* CDOM fluorescence in  $\text{mg m}^{-1}$ .

**Table S2.** Sequence, OTU and diversity information for the 24 Beaufort Sea microbial samples.

| Station | Depth category     | Raw reads | Quality reads <sup>a</sup> | Total OTUs <sup>b,c</sup> | PD <sup>c</sup> | Shannon <sup>c</sup> | Chao1 <sup>c</sup> | NRI  |
|---------|--------------------|-----------|----------------------------|---------------------------|-----------------|----------------------|--------------------|------|
| 430     | Z <sub>SURF</sub>  | 13077     | 10495                      | 163                       | 19.14           | 4.98                 | 204.17             | 2.38 |
|         | Z <sub>a-SCM</sub> | 12905     | 10609                      | 159                       | 19.55           | 4.60                 | 167.71             | 1.31 |
|         | Z <sub>SCM</sub>   | 11261     | 9381                       | 181                       | 21.80           | 4.60                 | 212.05             | 1.56 |
|         | Z <sub>b-SCM</sub> | 11102     | 8405                       | 278                       | 32.32           | 6.41                 | 319.00             | 2.96 |
| 460     | Z <sub>SURF</sub>  | 12600     | 9591                       | 224                       | 23.71           | 5.87                 | 246.80             | 3.06 |
|         | Z <sub>a-SCM</sub> | 13723     | 11123                      | 202                       | 23.97           | 5.05                 | 235.66             | 1.47 |
|         | Z <sub>SCM</sub>   | 13186     | 10732                      | 234                       | 28.08           | 5.52                 | 286.00             | 2.20 |
|         | Z <sub>b-SCM</sub> | 8356      | 6150                       | 293                       | 37.02           | 6.61                 | 371.08             | 2.09 |
| 540     | Z <sub>SURF</sub>  | 12454     | 9900                       | 192                       | 20.07           | 5.58                 | 244.00             | 3.32 |
|         | Z <sub>a-SCM</sub> | 11105     | 9138                       | 222                       | 24.99           | 5.70                 | 260.78             | 1.91 |
|         | Z <sub>SCM</sub>   | 12701     | 9985                       | 269                       | 29.79           | 5.79                 | 345.66             | 1.83 |
|         | Z <sub>b-SCM</sub> | 10399     | 7544                       | 300                       | 35.20           | 6.67                 | 350.83             | 1.91 |
| 620     | Z <sub>SURF</sub>  | 10128     | 7557                       | 228                       | 24.63           | 5.90                 | 314.56             | 2.54 |
|         | Z <sub>a-SCM</sub> | 11323     | 7722                       | 186                       | 19.30           | 5.60                 | 305.00             | 3.50 |
|         | Z <sub>SCM</sub>   | 10271     | 6925                       | 229                       | 27.97           | 5.70                 | 314.55             | 3.21 |
|         | Z <sub>b-SCM</sub> | 8449      | 5585                       | 262                       | 32.29           | 6.28                 | 342.37             | 4.07 |
| 670     | Z <sub>SURF</sub>  | 12790     | 8348                       | 257                       | 24.82           | 6.45                 | 289.46             | 3.47 |
|         | Z <sub>a-SCM</sub> | 9380      | 6859                       | 294                       | 32.49           | 6.24                 | 338.38             | 3.75 |
|         | Z <sub>SCM</sub>   | 9650      | 5816                       | 217                       | 26.10           | 5.30                 | 255.02             | 3.19 |
|         | Z <sub>b-SCM</sub> | 9640      | 5799                       | 307                       | 37.92           | 6.71                 | 377.03             | 3.25 |
| 760     | Z <sub>SURF</sub>  | 12130     | 8319                       | 185                       | 20.29           | 5.65                 | 250.87             | 3.35 |
|         | Z <sub>a-SCM</sub> | 12009     | 6569                       | 204                       | 23.93           | 5.19                 | 350.75             | 1.57 |
|         | Z <sub>SCM</sub>   | 12465     | 8443                       | 278                       | 33.11           | 6.19                 | 331.03             | 2.14 |
|         | Z <sub>b-SCM</sub> | 11156     | 6964                       | 317                       | 36.84           | 6.68                 | 369.48             | 2.08 |

OTUs: operational taxonomic units; PD: phylogenetic diversity; NRI: net-relatedness index.

<sup>a</sup>: after quality controls (de-noising, removal of short, low-quality and/or chimeric reads).

<sup>b</sup>: at 98% sequence identity.

<sup>c</sup>: computed on quality read datasets subsampled at an even depth of 5000 sequences.

**Table S3.** Results of environmental factor fitting on ordination and permutational analyses of variance on distance matrices (EFF and PVM, respectively).

| Variable                         | EFF                   |          | PVM                   |          |
|----------------------------------|-----------------------|----------|-----------------------|----------|
|                                  | <i>R</i> <sup>2</sup> | <i>P</i> | <i>R</i> <sup>2</sup> | <i>P</i> |
| SiOH <sub>4</sub>                | 0.575                 | 0.003    | 0.370                 | < 0.001  |
| Picoeuk <sup>a</sup>             | 0.549                 | 0.001    | 0.321                 | < 0.001  |
| NO <sub>3</sub> +NO <sub>2</sub> | 0.519                 | 0.006    | 0.343                 | < 0.001  |
| O <sub>2</sub>                   | 0.477                 | 0.009    | 0.341                 | < 0.001  |
| NH <sub>4</sub>                  | 0.338                 | 0.026    | 0.062                 | 0.204    |
| Light                            | 0.319                 | 0.069    | 0.191                 | 0.01     |
| DOP                              | 0.264                 | 0.105    | 0.031                 | 0.576    |
| Bacteria <sup>a</sup>            | 0.188                 | 0.235    | 0.096                 | 0.122    |
| Nanoeuk <sup>a</sup>             | 0.083                 | 0.539    | 0.109                 | 0.09     |

DOP: dissolved organic phosphorus; Picoeuk/Nanoeuk: picoeukaryotic and nanoeukaryotic phytoplankton cell counts, respectively.

<sup>a</sup>: Cell counts via flow cytometry; data missing for station 460.

<sup>b</sup>: DOP data missing for samples 430-Z<sub>aSCM</sub>, 430-Z<sub>bSCM</sub> and 620-Z<sub>bSCM</sub>.

**Table S4.** Taxa differently abundant between SCM and wSCM communities ( $P \leq 0.05$ ).

| Eukaryotic clade | Lineage                              | Taxa                       | SCM relative abundance <sup>a</sup>    | wSCM relative abundance <sup>a</sup>   | <i>P</i> -value <sup>b</sup> |
|------------------|--------------------------------------|----------------------------|----------------------------------------|----------------------------------------|------------------------------|
| Alveolata        | Ciliate<br>(Intramacronucleata)      | <i>Laboea</i>              | 0.62±3.5e <sup>-3</sup>                | 0.02 ±2.7e <sup>-5</sup>               | 0.011                        |
|                  |                                      | <i>Novistrombidium</i>     | 8.18±0.3                               | 2.06±1.5e <sup>-3</sup>                | 0.008                        |
|                  |                                      | <i>Pseudotontonia</i>      | 3.74±0.04                              | 1.11±0.01                              | 0.005                        |
|                  |                                      | <i>Tintinnopsis</i>        | 0.05±2.4e <sup>-5</sup>                | 2.4e <sup>-3</sup> ±3.4e <sup>-7</sup> | 0.007                        |
|                  | Dinoflagellates<br>(Dinophyceae GPP) | NOR26.29 group             | 0                                      | 0.39±2.2e <sup>-3</sup>                | 0.042                        |
|                  |                                      | <i>G. helveticum</i> group | 1.12±1.5e <sup>-3</sup>                | 10.55±0.7                              | 0.009                        |
|                  |                                      | <i>Lepidodinium</i>        | 1.29±0.01                              | 0.15±3.1e <sup>-4</sup>                | 0.013                        |
|                  | Ellobiopsidae                        | <i>Thalassomyces</i>       | 0                                      | 9.6e <sup>-3</sup> ±5.5e <sup>-6</sup> | 0.022                        |
|                  |                                      | IIB / Guillou II.27*       | 0.01±1.0e <sup>-6</sup>                | 4.2e <sup>-3</sup> ±4.4e <sup>-7</sup> | 0.021                        |
|                  |                                      | MALVs                      | IIB / Guillou II.7.36*                 | 0.98±1.6e <sup>-3</sup>                | 0.49±6.3e <sup>-4</sup>      |
| Cryptophyta      | Cryptomonadales                      | II / Guillou II.3.4*       | 3.20±0.09                              | 0.61±2e <sup>-3</sup>                  | 0.029                        |
|                  |                                      | Cryptomonas                | 0                                      | 9.6e <sup>-3</sup> ±5.5e <sup>-6</sup> | 0.022                        |
|                  |                                      | Unclassified               | CCMP2045                               | 0.03±8.8e <sup>-6</sup>                | 0                            |
| Picozoa          | Picozoa                              | Arctic NW617.02            | 2.73±0.02                              | 11.69±0.7                              | 0.018                        |
| Rhizaria         | Cercozoa                             | NOR46.14                   | 6.6e <sup>-3</sup> ±8.1e <sup>-7</sup> | 0.08±4.7e <sup>-5</sup>                | 0.012                        |
|                  |                                      | <i>Cryothecomonas</i>      | 0.07±3.2e <sup>-5</sup>                | 0.01±4.0e <sup>-6</sup>                | 0.011                        |
|                  |                                      | <i>Ebria</i>               | 0                                      | 0.02±2.6e <sup>-6</sup>                | 0.0007                       |
|                  |                                      | <i>Pseudopirsonia</i>      | 0                                      | 0.01±4.3e <sup>-6</sup>                | 0.022                        |
| Stramenopiles    | Bolidophyceae                        | <i>Bolidomonas</i>         | 0.06±2.9e <sup>-5</sup>                | 0.13±1.7e <sup>-5</sup>                | 0.011                        |
|                  | Bacillariophyceae                    | <i>Craticula</i>           | 0                                      | 0.01±8.5e <sup>-6</sup>                | 0.022                        |
|                  | Mediophyceae                         | <i>Chaetoceros</i>         | 0.04±4.4e <sup>-5</sup>                | 0.29±5.3e <sup>-4</sup>                | 0.014                        |
|                  |                                      | <i>Thalassiosira</i>       | 0.50±6.4e <sup>-4</sup>                | 0.99±2.4e <sup>-3</sup>                | 0.033                        |
|                  | MAST                                 | MAST-1B                    | 0.13±1.4e <sup>-4</sup>                | 0.75±4.7e <sup>-3</sup>                | 0.031                        |
|                  |                                      | MAST-2                     | 0.08±3.1e <sup>-5</sup>                | 0.03±4.5e <sup>-6</sup>                | 0.044                        |
| MAST-3           |                                      | 0.03±2.9e <sup>-5</sup>    | 0.24±4.0e <sup>-4</sup>                | 0.017                                  |                              |
| MAST-7           |                                      | 1.80±2.5e <sup>-3</sup>    | 2.50±1.7e <sup>-3</sup>                | 0.002                                  |                              |
| MAST-8           | 0.20±4.9e <sup>-4</sup>              | 1.15±3.1e <sup>-3</sup>    | 0.001                                  |                                        |                              |
| Telonemia        | Telonemida                           | <i>Telonema</i>            | 2.57±0.01                              | 1.34±2.7e <sup>-3</sup>                | 0.034                        |
| Viridiplantae    | Mamiellophyceae                      | <i>Micromonas</i> CCMP2099 | 24.89±0.95                             | 9.44±2.1                               | 0.03                         |

<sup>a</sup> : mean relative abundance ± standard deviation (%).

<sup>b</sup> : significance at  $P < 0.05$  (Metastats).

\* : Guillou L., *et al.*, *Environmental Microbiology*, 10: 3349–3365. doi: 10.1111/j.1462-2920.2008.01731.x
